# Supplementary material
Source: ML conference proceedings conference paper supplement (https://openaccess.thecvf.com/content/CVPR2023/html/Li_Compressing_Volumetric_Radiance_CVPR_2023_paper.html)
Supplement: Supplementary file 1 [file Li_Compressing_Volumetric_Radiance_CVPR_2023_supplemental.pdf]

# Compressing Volumetric Radiance Fields to 1 MB

## Supplementary Material

### A. Detailed Results

We present detailed results for each scene on the datasets used in the main paper, including synthetic-NeRF [29] in Table 8, LLFF [28] in Table 9, synthetic-NSVF [23] in Table 10 and Tanks&Temples [19] in Table 11, respectively. The detailed comparison validate that our method can achieve comparable rendering quality with significant advantage on model size overhead compared to original DVGO [37], Plenoxels [44] and TensoRF [2], demonstrating the effectiveness and generalizability of our method.

### B. More Qualitative Comparison

We further show rendering a randomly selected view of example scenes on the datasets in Figure 9, 10, 11 and 12, respectively. The rendering quality of the model after compression via our method can be effectively preserved compared to the model before compression, even on fine details, meanwhile we can achieve much lower storage cost via our compression framework.

### C. Comparison with VBNF

We compare our approach with VBNF [38] alone and present the results in Table 6, as the experimental configuration introduced in its paper (and code) is quite different from ours and other baselines. It needs depth as input, and is less suitable to evaluate on widely-used NeRF datasets as other baselines, e.g., it fails to reconstruct “Lego” without depth. To ensure a fair comparison, we used the official code and configuration of VBNF (at  $400 \times 400$  resolution) available on the GitHub repo of kaolin-wisp. Table 6 shows the comparison result.

| Method  | PSNR $\uparrow$<br>dB | Size $\downarrow$<br>MB | Train $\downarrow$<br>min | Test $\downarrow$<br>ms | Need<br>depth? |
|---------|-----------------------|-------------------------|---------------------------|-------------------------|----------------|
| VBNF    | 28.81                 | 0.705                   | 24                        | 20                      | ✓              |
| DVGO    | 28.97                 | 45.9                    | 2.6                       | 40                      | ✗              |
| VQ-DVGO | 28.84                 | 0.633                   | 2.6+1.4                   | 47                      | ✗              |

Table 6. Comparison with VBNF on test set of V8 scene.

### D. Ablation of voxel-pruning strategies.

Table 7 provides the ablation by replacing our pruning strategies with several alternatives and performing VQ and post-processing. The results demonstrate that, compared to simply choosing a fixed threshold, our proposed pruning

metric achieves a more desirable balance between model size and rendering quality.

| Pruning Strategy      | Without Pruning | Density Threshold |       |       | Ours  |
|-----------------------|-----------------|-------------------|-------|-------|-------|
|                       |                 | 0                 | 2.5   | 5.0   |       |
| PSNR(dB) $\uparrow$   | 31.60           | 31.34             | 30.96 | 30.58 | 31.77 |
| Size(MB) $\downarrow$ | 3.06            | 1.58              | 1.46  | 1.26  | 1.43  |

Table 7. Ablation of voxel-pruning strategies with DVGO.

### E. Composition of final storage.

Figure 8 demonstrates the proportion of the three different part after applying our compression pipeline to volumetric radiance fields. Since metadata and MLP weights take a fairly small amount of storage, we combine their size with codebook size for better visualization.

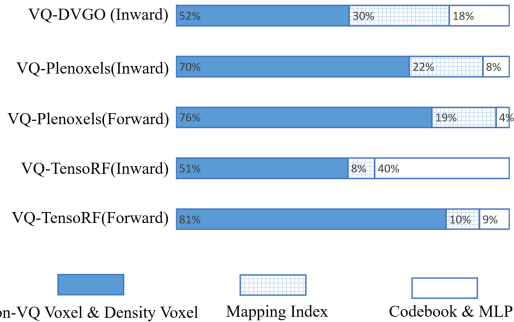

Figure 8. Visualization of model size proportion after compression. “Inward” represent the average results of synthetic-NeRF, synthetic-NSVF, and Tanks&Temples datasets.” Forward” represent results on LLFF datasets.

### F. Implementation Details

**VQ-DVGO.** The model of DVGO consists of density grid, feature grid and a shallow MLP for color estimation. As mentioned in the main paper, we first prune off less important voxels according to the quantile of the cumulative score rate. We only use the voxels that need to be vector quantized for codebook initialization. After codebook initialization, we start joint finetuning with the learning rate  $8e-2$  for density grid,  $1.6e-3$  for both the feature grid and the shallow MLP. We adopt an exponential learning rate decay schedule following its original setup, downscaling the learning rates by 0.3 for every 10k iterations. The finetuning stage takes 10000 iterations with 8192 rays per iteration. The overall

compressing time takes about 50% of the original training time across different scenes.

**VQ-Plenoxels.** Plenoxels include a density grid and a feature grid that are filled with spherical harmonic coefficients. During the joint finetuning phase for Plenoxels, only the vector-quantized voxel grid is tuned since this method does not involve neural networks. The fine-tuning process consists of 25600 iterations, which is equivalent to two epochs in the original Plenoxels. The learning rate scheduler is reset to the sixth epoch in the original setting. The batch size for this process is 5000, and it incurs a time cost of about 20% of the original training time.

**VQ-TensoRF.** We choose TensorRF-VM-192 as the default model. As TensorRF utilizes a triplane structure of feature volumes, we assign three different codebooks to the three planes for more extensive model capacity, and also apply three codebooks for vector quantization on density planes. In practice, we leverage a virtual grid and compute importance scores for all the grid points. Then the points are projected onto triplanes by aggregating them along each axis. The joint finetuning stage for TensorRF takes 10000 iterations, with the learning rate  $5e-3$  for all the density triplane, feature triplane and the shallow MLP. We adopt an exponential learning rate decay for TensorRF, downscaling the learning rate by 0.3 for every 30k iterations.

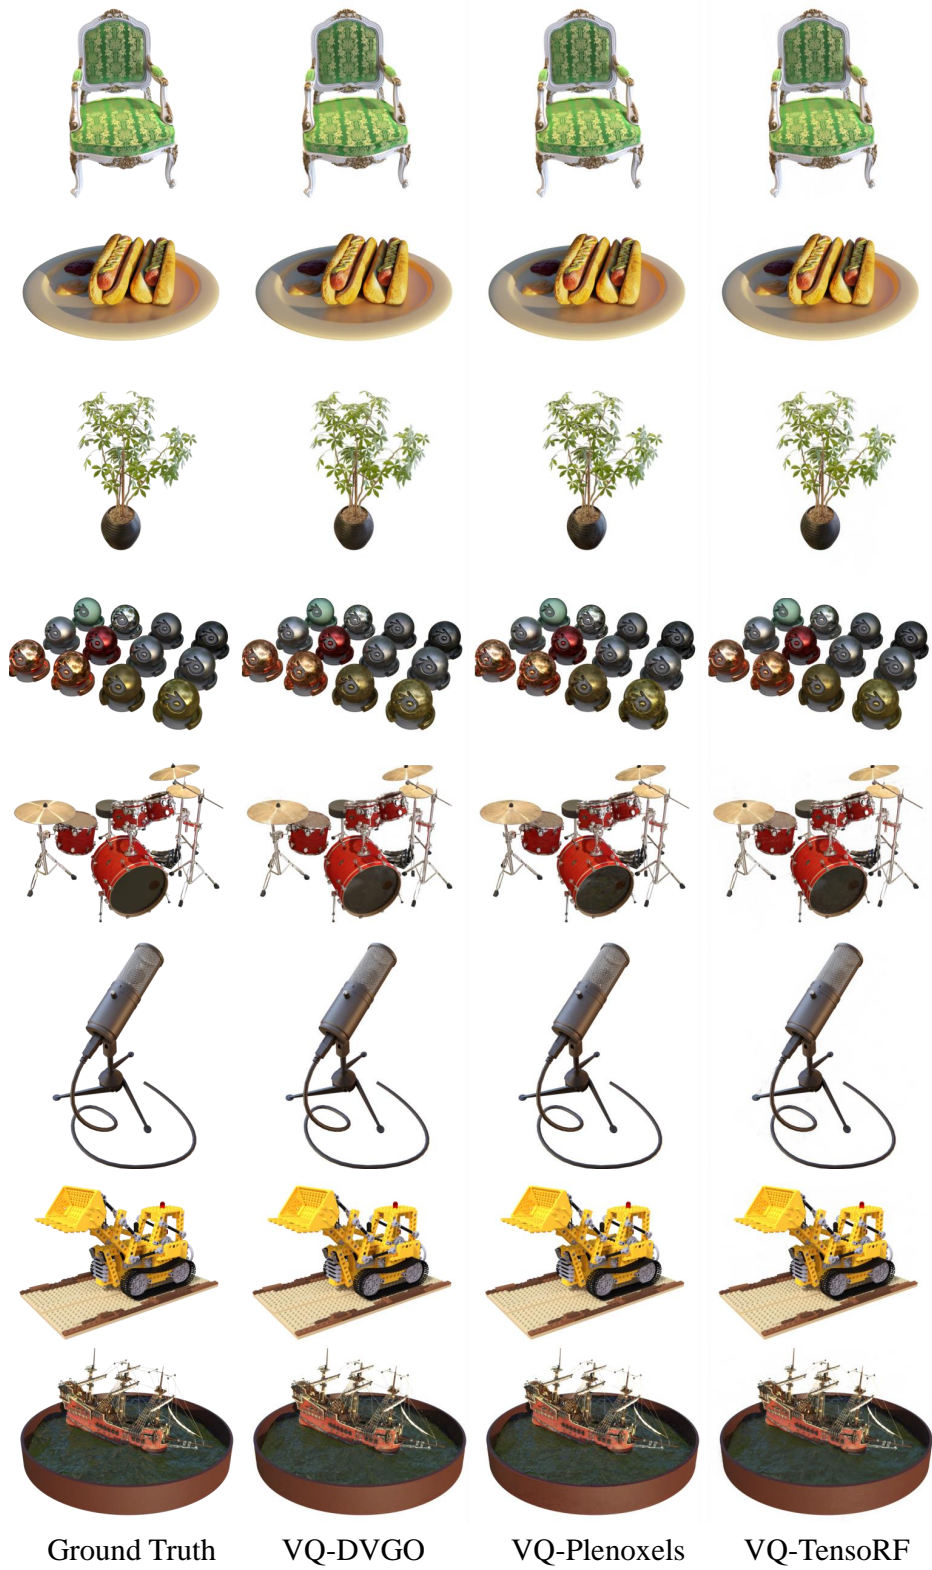

Figure 9. **Synthetic-NeRF scenes.** We show a random view for each scene in the dataset, comparing ground truth with our VQ-DVGO, VQ-Plenoxels, VQ-TensorRF.



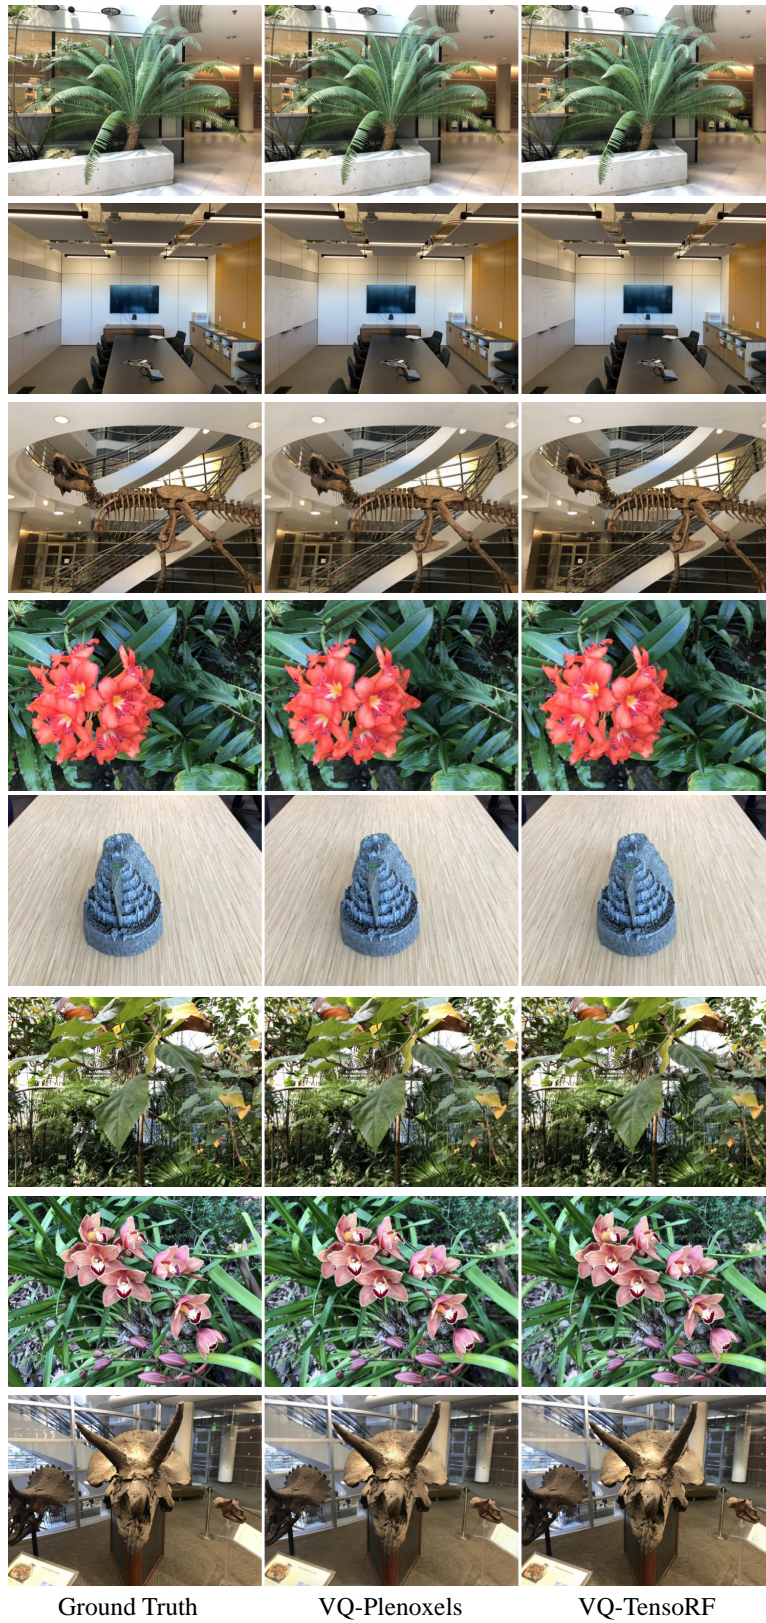

Figure 10. **LLFF scenes.** We show a random view for each scene in the dataset, comparing ground truth with our VQ-Plenoxels, VQ-TensorRF.

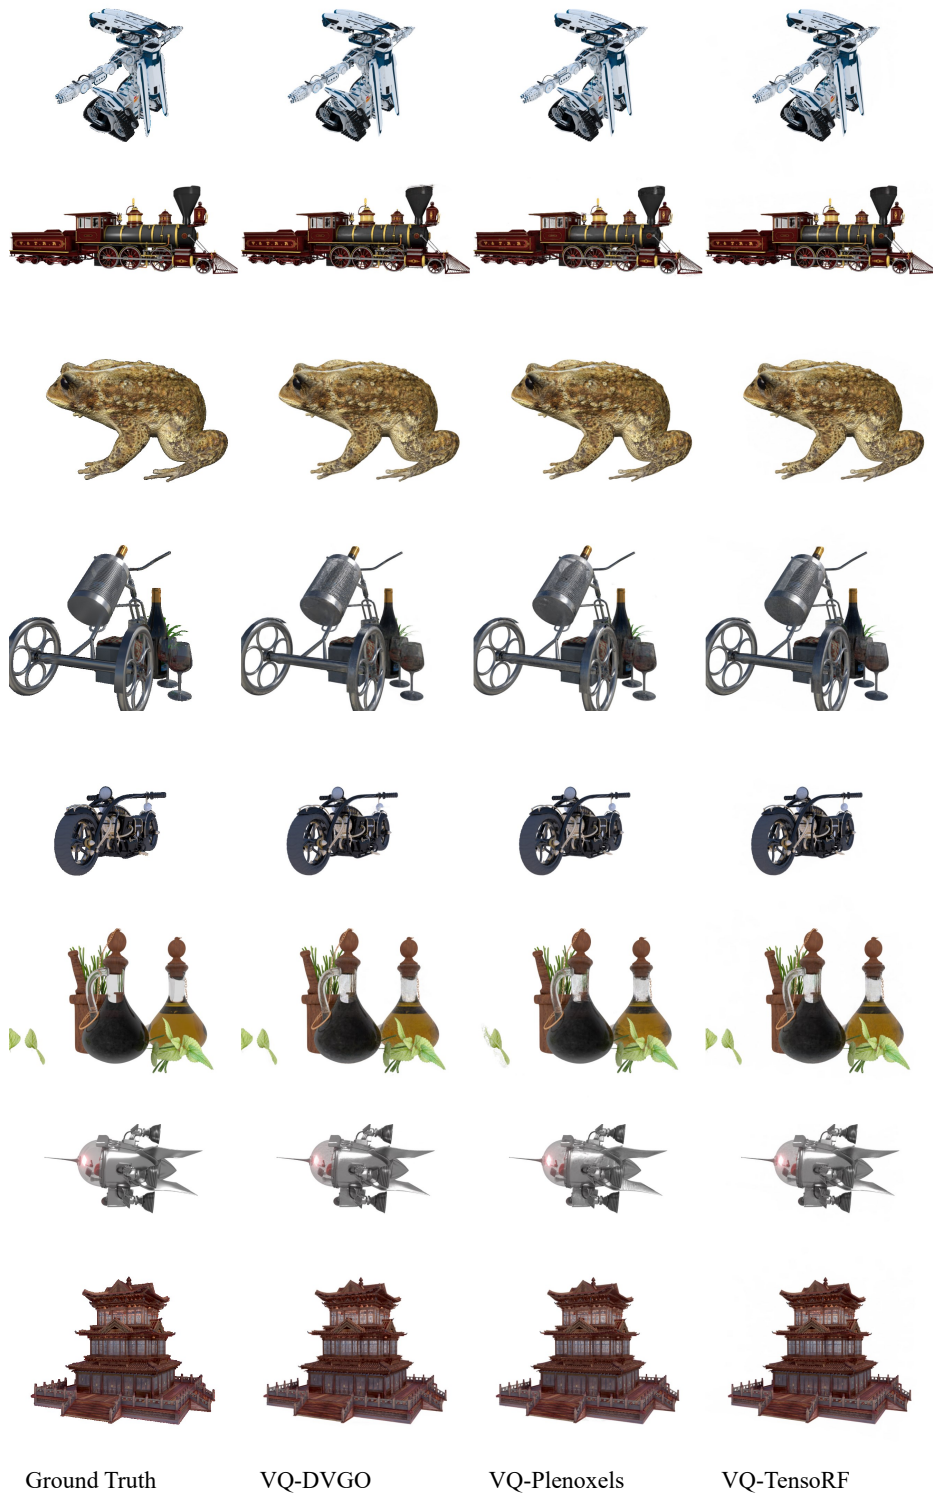

Ground Truth

VQ-DVGO

VQ-Plenoxels

VQ-TensoRF

Figure 11. **Synthetic-NSVF scenes.** We show a random view for each scene in the dataset, comparing ground truth with our VQ-DVGO, VQ-Plenoxels, VQ-TensoRF.

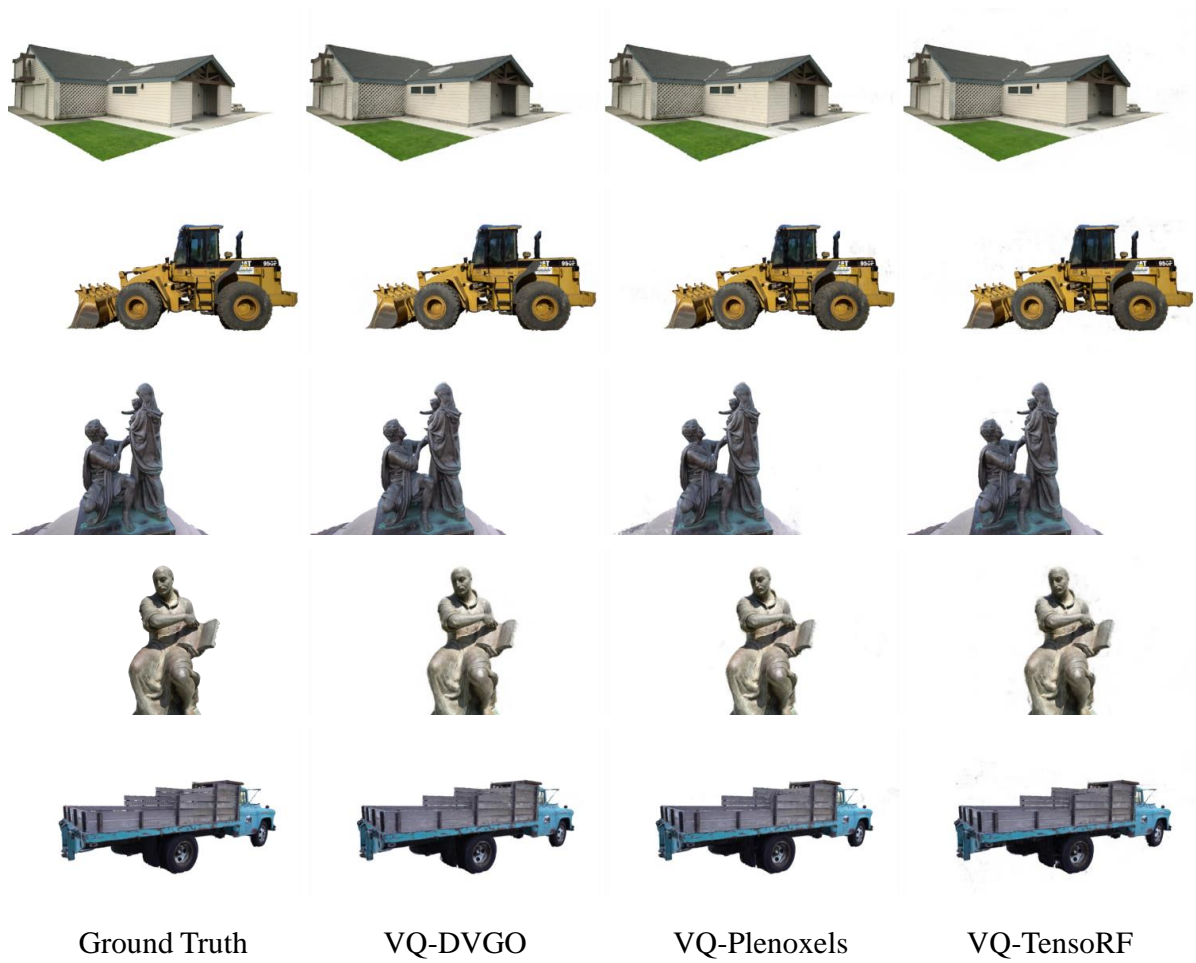

Figure 12. **Tanks&Temples scenes.** We show a random view for each scene in the dataset, comparing ground truth with our VQ-DVGO, VQ-Plenoxels, VQ-TensoRF.



|                                        |              | <b>Synthetic-NeRF</b> |        |        |        |        |           |       |        |             |
|----------------------------------------|--------------|-----------------------|--------|--------|--------|--------|-----------|-------|--------|-------------|
|                                        | Method       | Chair                 | Drums  | Ficus  | Hotdog | Lego   | Materials | Mic   | Ship   | <b>Avg.</b> |
| Size(MB) ( $\downarrow$ )              | DVGO         | 99.86                 | 90.64  | 103.98 | 124.73 | 118.56 | 163.77    | 47.03 | 98.79  | 105.92      |
|                                        | VQ-DVGO      | 0.99                  | 0.89   | 1.06   | 1.46   | 1.48   | 3.11      | 0.41  | 2.05   | 1.43        |
|                                        | Plenoxels    | 186.17                | 161.51 | 108.46 | 292.43 | 294.53 | 196.51    | 82.27 | 756.37 | 259.78      |
|                                        | VQ-Plenoxels | 10.12                 | 7.17   | 4.31   | 17.45  | 13.56  | 4.09      | 12.35 | 40.41  | 13.68       |
|                                        | TensorRF     | 62.99                 | 63.20  | 66.00  | 78.06  | 63.88  | 78.51     | 62.09 | 65.74  | 67.56       |
|                                        | VQ-TensorRF  | 3.47                  | 3.31   | 4.12   | 3.52   | 3.57   | 4.27      | 2.44  | 3.76   | 3.56        |
| PSNR(dB) ( $\uparrow$ )                | DVGO         | 34.09                 | 25.47  | 32.66  | 36.67  | 34.59  | 29.51     | 33.11 | 29.11  | 31.90       |
|                                        | VQ-DVGO      | 33.80                 | 25.38  | 32.67  | 36.47  | 34.27  | 29.28     | 33.11 | 29.24  | 31.77       |
|                                        | Plenoxels    | 33.99                 | 25.35  | 31.83  | 36.42  | 34.10  | 29.14     | 33.27 | 29.62  | 31.71       |
|                                        | VQ-Plenoxels | 33.82                 | 25.30  | 31.87  | 36.01  | 33.66  | 28.89     | 33.24 | 29.45  | 31.53       |
|                                        | TensorRF     | 35.61                 | 25.98  | 33.95  | 37.40  | 36.36  | 30.03     | 34.82 | 30.57  | 33.09       |
|                                        | VQ-TensorRF  | 35.10                 | 25.97  | 33.85  | 36.98  | 36.03  | 30.07     | 34.45 | 30.38  | 32.86       |
| SSIM( $\uparrow$ )                     | DVGO         | 0.976                 | 0.930  | 0.978  | 0.980  | 0.976  | 0.950     | 0.983 | 0.878  | 0.956       |
|                                        | VQ-DVGO      | 0.974                 | 0.928  | 0.977  | 0.978  | 0.973  | 0.945     | 0.982 | 0.877  | 0.954       |
|                                        | Plenoxels    | 0.977                 | 0.933  | 0.976  | 0.980  | 0.975  | 0.949     | 0.985 | 0.890  | 0.958       |
|                                        | VQ-Plenoxels | 0.975                 | 0.931  | 0.975  | 0.979  | 0.972  | 0.945     | 0.984 | 0.889  | 0.956       |
|                                        | TensorRF     | 0.984                 | 0.937  | 0.982  | 0.982  | 0.983  | 0.952     | 0.988 | 0.892  | 0.963       |
|                                        | VQ-TensorRF  | 0.981                 | 0.932  | 0.982  | 0.980  | 0.981  | 0.950     | 0.986 | 0.887  | 0.960       |
| LPIPS <sub>ALEX</sub> ( $\downarrow$ ) | DVGO         | 0.017                 | 0.060  | 0.015  | 0.018  | 0.013  | 0.027     | 0.014 | 0.117  | 0.035       |
|                                        | VQ-DVGO      | 0.018                 | 0.061  | 0.017  | 0.018  | 0.013  | 0.033     | 0.014 | 0.112  | 0.036       |
|                                        | Plenoxels    | 0.019                 | 0.055  | 0.015  | 0.018  | 0.016  | 0.012     | 0.026 | 0.083  | 0.031       |
|                                        | VQ-Plenoxels | 0.020                 | 0.057  | 0.016  | 0.021  | 0.018  | 0.031     | 0.013 | 0.089  | 0.033       |
|                                        | TensorRF     | 0.010                 | 0.051  | 0.013  | 0.014  | 0.007  | 0.027     | 0.008 | 0.087  | 0.027       |
|                                        | VQ-TensorRF  | 0.016                 | 0.063  | 0.014  | 0.017  | 0.009  | 0.030     | 0.013 | 0.094  | 0.032       |
| LPIPS <sub>VGG</sub> ( $\downarrow$ )  | DVGO         | 0.028                 | 0.078  | 0.025  | 0.034  | 0.027  | 0.059     | 0.018 | 0.160  | 0.054       |
|                                        | VQ-DVGO      | 0.032                 | 0.082  | 0.028  | 0.039  | 0.030  | 0.066     | 0.020 | 0.160  | 0.057       |
|                                        | Plenoxels    | 0.031                 | 0.067  | 0.026  | 0.038  | 0.028  | 0.057     | 0.015 | 0.134  | 0.050       |
|                                        | VQ-Plenoxels | 0.033                 | 0.072  | 0.028  | 0.041  | 0.033  | 0.064     | 0.017 | 0.139  | 0.053       |
|                                        | TensorRF     | 0.022                 | 0.072  | 0.023  | 0.032  | 0.018  | 0.060     | 0.015 | 0.141  | 0.048       |
|                                        | VQ-TensorRF  | 0.035                 | 0.099  | 0.028  | 0.040  | 0.024  | 0.064     | 0.025 | 0.149  | 0.058       |

Table 8. Per-scene results on Synthetic-NeRF [29].

|                                        |              | <b>LLFF</b> |         |         |         |         |         |         |          |         |             |
|----------------------------------------|--------------|-------------|---------|---------|---------|---------|---------|---------|----------|---------|-------------|
|                                        |              | Method      | Fern    | Flower  | Room    | Leaves  | Horns   | Trex    | Fortress | Orchids | <b>Avg.</b> |
| Size(MB) ( $\downarrow$ )              | Plenoxels    | 1842.22     | 1719.30 | 1613.74 | 2061.28 | 1959.84 | 1819.81 | 1685.97 | 3347.22  | 2006.17 |             |
|                                        | VQ-Plenoxels | 38.94       | 38.92   | 31.40   | 41.71   | 38.34   | 34.64   | 38.82   | 57.40    | 40.02   |             |
|                                        | TensoRF      | 179.92      | 179.81  | 179.87  | 179.70  | 179.81  | 179.85  | 179.87  | 179.90   | 179.84  |             |
|                                        | VQ-TensoRF   | 8.61        | 8.97    | 8.02    | 9.14    | 8.40    | 8.11    | 9.32    | 9.20     | 8.72    |             |
| PSNR(dB) ( $\uparrow$ )                | Plenoxels    | 25.51       | 28.16   | 30.29   | 21.58   | 27.68   | 26.51   | 31.10   | 20.65    | 26.44   |             |
|                                        | VQ-Plenoxels | 25.46       | 27.91   | 30.18   | 21.50   | 27.52   | 26.11   | 30.93   | 20.53    | 26.27   |             |
|                                        | TensoRF      | 25.03       | 28.10   | 32.16   | 21.12   | 28.31   | 27.56   | 31.44   | 19.85    | 26.70   |             |
|                                        | VQ-TensoRF   | 24.82       | 27.82   | 31.89   | 21.00   | 27.96   | 27.30   | 31.14   | 19.75    | 26.46   |             |
| SSIM( $\uparrow$ )                     | Plenoxels    | 0.835       | 0.866   | 0.938   | 0.764   | 0.859   | 0.891   | 0.886   | 0.698    | 0.842   |             |
|                                        | VQ-Plenoxels | 0.833       | 0.861   | 0.936   | 0.761   | 0.856   | 0.888   | 0.884   | 0.691    | 0.839   |             |
|                                        | TensoRF      | 0.801       | 0.857   | 0.952   | 0.744   | 0.883   | 0.910   | 0.898   | 0.644    | 0.836   |             |
|                                        | VQ-TensoRF   | 0.791       | 0.843   | 0.947   | 0.727   | 0.866   | 0.902   | 0.881   | 0.636    | 0.824   |             |
| LPIPS <sub>ALEX</sub> ( $\downarrow$ ) | Plenoxels    | 0.150       | 0.122   | 0.128   | 0.153   | 0.178   | 0.132   | 0.108   | 0.187    | 0.145   |             |
|                                        | VQ-Plenoxels | 0.146       | 0.119   | 0.126   | 0.146   | 0.176   | 0.131   | 0.105   | 0.184    | 0.142   |             |
|                                        | TensoRF      | 0.157       | 0.103   | 0.076   | 0.144   | 0.103   | 0.080   | 0.067   | 0.192    | 0.115   |             |
|                                        | VQ-TensoRF   | 0.166       | 0.115   | 0.084   | 0.156   | 0.125   | 0.089   | 0.098   | 0.202    | 0.129   |             |
| LPIPS <sub>VGG</sub> ( $\downarrow$ )  | Plenoxels    | 0.835       | 0.866   | 0.938   | 0.764   | 0.859   | 0.891   | 0.886   | 0.698    | 0.842   |             |
|                                        | VQ-Plenoxels | 0.220       | 0.180   | 0.199   | 0.200   | 0.232   | 0.238   | 0.178   | 0.241    | 0.211   |             |
|                                        | TensoRF      | 0.249       | 0.178   | 0.162   | 0.221   | 0.182   | 0.201   | 0.143   | 0.281    | 0.202   |             |
|                                        | VQ-TensoRF   | 0.263       | 0.200   | 0.173   | 0.249   | 0.214   | 0.218   | 0.183   | 0.294    | 0.224   |             |

Table 9. Per-scene Results on LLFF [28].



|                                        |              | <b>Synthetic-NSVF</b> |        |           |        |        |           |            |        |           |             |
|----------------------------------------|--------------|-----------------------|--------|-----------|--------|--------|-----------|------------|--------|-----------|-------------|
|                                        |              | Method                | Bike   | Lifestyle | Palace | Robot  | Spaceship | Steamtrain | Toad   | Winholder | <b>Avg.</b> |
| Size(MB) ( $\downarrow$ )              | DVGO         | 114.91                | 103.68 | 109.25    | 102.15 | 132.30 | 156.25    | 133.37     | 106.40 | 119.79    |             |
|                                        | VQ-DVGO      | 1.08                  | 1.08   | 1.50      | 0.99   | 1.67   | 1.98      | 0.85       | 0.94   | 1.26      |             |
|                                        | Plenoxels    | 89.25                 | 361.27 | 629.13    | 137.08 | 183.12 | 91.79     | 610.44     | 164.62 | 283.34    |             |
|                                        | VQ-Plenoxels | 4.14                  | 15.88  | 27.54     | 6.21   | 6.80   | 4.17      | 22.72      | 7.57   | 11.88     |             |
|                                        | TensoRF      | 73.53                 | 67.56  | 67.37     | 70.73  | 70.60  | 83.71     | 71.44      | 68.18  | 71.64     |             |
|                                        | VQ-TensoRF   | 3.75                  | 4.47   | 3.70      | 3.69   | 4.24   | 4.49      | 5.18       | 3.88   | 4.17      |             |
| PSNR(dB) ( $\uparrow$ )                | DVGO         | 38.14                 | 33.74  | 34.46     | 36.38  | 37.53  | 35.43     | 32.99      | 30.26  | 34.87     |             |
|                                        | VQ-DVGO      | 37.89                 | 33.65  | 34.42     | 36.06  | 37.51  | 35.32     | 32.68      | 30.25  | 34.72     |             |
|                                        | Plenoxels    | 37.83                 | 31.04  | 35.30     | 35.91  | 34.36  | 34.21     | 34.34      | 30.01  | 34.12     |             |
|                                        | VQ-Plenoxels | 37.47                 | 30.93  | 34.94     | 35.61  | 34.25  | 34.00     | 34.16      | 29.91  | 33.91     |             |
|                                        | TensoRF      | 39.39                 | 34.64  | 37.84     | 38.55  | 38.74  | 37.99     | 35.10      | 31.49  | 36.72     |             |
|                                        | VQ-TensoRF   | 38.67                 | 34.46  | 37.42     | 37.95  | 38.36  | 37.60     | 33.54      | 31.36  | 36.17     |             |
| SSIM( $\uparrow$ )                     | DVGO         | 0.991                 | 0.965  | 0.962     | 0.992  | 0.987  | 0.987     | 0.965      | 0.950  | 0.975     |             |
|                                        | VQ-DVGO      | 0.991                 | 0.964  | 0.961     | 0.991  | 0.987  | 0.987     | 0.963      | 0.950  | 0.974     |             |
|                                        | Plenoxels    | 0.992                 | 0.967  | 0.974     | 0.991  | 0.981  | 0.983     | 0.976      | 0.959  | 0.978     |             |
|                                        | VQ-Plenoxels | 0.991                 | 0.965  | 0.972     | 0.990  | 0.981  | 0.981     | 0.974      | 0.957  | 0.976     |             |
|                                        | TensoRF      | 0.993                 | 0.969  | 0.981     | 0.995  | 0.989  | 0.991     | 0.979      | 0.962  | 0.982     |             |
|                                        | VQ-TensoRF   | 0.992                 | 0.967  | 0.978     | 0.994  | 0.988  | 0.989     | 0.970      | 0.960  | 0.980     |             |
| LPIPS <sub>ALEX</sub> ( $\downarrow$ ) | DVGO         | 0.004                 | 0.026  | 0.027     | 0.005  | 0.009  | 0.011     | 0.029      | 0.036  | 0.018     |             |
|                                        | VQ-DVGO      | 0.004                 | 0.026  | 0.025     | 0.005  | 0.010  | 0.011     | 0.029      | 0.035  | 0.018     |             |
|                                        | Plenoxels    | 0.004                 | 0.030  | 0.016     | 0.006  | 0.017  | 0.017     | 0.019      | 0.027  | 0.017     |             |
|                                        | VQ-Plenoxels | 0.005                 | 0.032  | 0.018     | 0.006  | 0.018  | 0.018     | 0.021      | 0.029  | 0.018     |             |
|                                        | TensoRF      | 0.003                 | 0.020  | 0.010     | 0.003  | 0.009  | 0.006     | 0.014      | 0.022  | 0.011     |             |
|                                        | VQ-TensoRF   | 0.003                 | 0.022  | 0.011     | 0.003  | 0.010  | 0.007     | 0.022      | 0.024  | 0.013     |             |
| LPIPS <sub>VGG</sub> ( $\downarrow$ )  | DVGO         | 0.011                 | 0.053  | 0.043     | 0.013  | 0.020  | 0.022     | 0.046      | 0.054  | 0.033     |             |
|                                        | VQ-DVGO      | 0.013                 | 0.056  | 0.043     | 0.013  | 0.022  | 0.023     | 0.047      | 0.056  | 0.034     |             |
|                                        | Plenoxels    | 0.011                 | 0.047  | 0.026     | 0.013  | 0.025  | 0.030     | 0.031      | 0.046  | 0.029     |             |
|                                        | VQ-Plenoxels | 0.013                 | 0.050  | 0.029     | 0.014  | 0.026  | 0.033     | 0.032      | 0.050  | 0.031     |             |
|                                        | TensoRF      | 0.010                 | 0.046  | 0.021     | 0.010  | 0.020  | 0.017     | 0.028      | 0.048  | 0.025     |             |
|                                        | VQ-TensoRF   | 0.013                 | 0.051  | 0.024     | 0.011  | 0.022  | 0.023     | 0.044      | 0.053  | 0.030     |             |

Table 10. Per-scene Results on Synthetic-NSVF [23].

| <b>Tanks&amp;Temples</b>               |              |        |             |        |          |        |        |
|----------------------------------------|--------------|--------|-------------|--------|----------|--------|--------|
|                                        | Method       | Barn   | Caterpillar | Family | Ignatius | Truck  | Avg.   |
| Size(MB) ( $\downarrow$ )              | DVGO         | 137.69 | 116.77      | 97.71  | 102.08   | 112.73 | 113.40 |
|                                        | VQ-DVGO      | 1.82   | 1.46        | 1.20   | 1.12     | 1.42   | 1.40   |
|                                        | Plenoxels    | 373.69 | 337.52      | 527.12 | 341.43   | 258.76 | 367.71 |
|                                        | VQ-Plenoxels | 11.97  | 13.40       | 20.90  | 15.63    | 9.43   | 14.27  |
|                                        | TensorRF     | 80.82  | 72.07       | 67.11  | 67.23    | 75.95  | 72.64  |
|                                        | VQ-TensorRF  | 3.04   | 3.47        | 2.79   | 3.46     | 3.51   | 3.25   |
| PSNR(dB) ( $\uparrow$ )                | DVGO         | 26.80  | 25.67       | 33.74  | 28.20    | 27.08  | 28.30  |
|                                        | VQ-DVGO      | 26.76  | 25.66       | 33.66  | 28.23    | 27.00  | 28.26  |
|                                        | Plenoxels    | 24.57  | 25.18       | 30.03  | 27.86    | 26.55  | 26.84  |
|                                        | VQ-Plenoxels | 24.53  | 24.99       | 29.93  | 27.76    | 26.43  | 26.73  |
|                                        | TensorRF     | 27.48  | 25.92       | 34.06  | 28.38    | 26.89  | 28.54  |
|                                        | VQ-TensorRF  | 27.11  | 25.59       | 33.43  | 28.27    | 26.59  | 28.20  |
| SSIM ( $\uparrow$ )                    | DVGO         | 0.837  | 0.903       | 0.962  | 0.943    | 0.905  | 0.910  |
|                                        | VQ-DVGO      | 0.837  | 0.901       | 0.961  | 0.942    | 0.903  | 0.909  |
|                                        | Plenoxels    | 0.842  | 0.904       | 0.959  | 0.942    | 0.909  | 0.911  |
|                                        | VQ-Plenoxels | 0.839  | 0.899       | 0.957  | 0.939    | 0.906  | 0.908  |
|                                        | TensorRF     | 0.866  | 0.910       | 0.966  | 0.949    | 0.913  | 0.921  |
|                                        | VQ-TensorRF  | 0.857  | 0.902       | 0.960  | 0.944    | 0.903  | 0.913  |
| LPIPS <sub>ALEX</sub> ( $\downarrow$ ) | DVGO         | 0.292  | 0.152       | 0.063  | 0.092    | 0.146  | 0.149  |
|                                        | VQ-DVGO      | 0.287  | 0.150       | 0.060  | 0.089    | 0.143  | 0.146  |
|                                        | Plenoxels    | 0.277  | 0.164       | 0.075  | 0.094    | 0.152  | 0.153  |
|                                        | VQ-Plenoxels | 0.291  | 0.162       | 0.075  | 0.102    | 0.152  | 0.156  |
|                                        | TensorRF     | 0.208  | 0.135       | 0.053  | 0.076    | 0.126  | 0.120  |
|                                        | VQ-TensorRF  | 0.231  | 0.167       | 0.063  | 0.084    | 0.155  | 0.140  |
| LPIPS <sub>VGG</sub> ( $\downarrow$ )  | DVGO         | 0.294  | 0.170       | 0.070  | 0.087    | 0.161  | 0.156  |
|                                        | VQ-DVGO      | 0.296  | 0.173       | 0.070  | 0.087    | 0.163  | 0.158  |
|                                        | Plenoxels    | 0.277  | 0.164       | 0.075  | 0.094    | 0.152  | 0.153  |
|                                        | VQ-Plenoxels | 0.284  | 0.179       | 0.080  | 0.103    | 0.160  | 0.161  |
|                                        | TensorRF     | 0.248  | 0.160       | 0.060  | 0.077    | 0.148  | 0.139  |
|                                        | VQ-TensorRF  | 0.275  | 0.193       | 0.075  | 0.088    | 0.182  | 0.163  |

Table 11. Per-scene Results on Tanks&Temples [19].
